# Supplementary material for: Early palliative care and overall survival in patients with metastatic upper gastrointestinal cancers (EPIC): a multicentre, open-label, randomised controlled phase 3 trial
Source: PubMed Central journal article supplement — eClinicalMedicine. 2024 Jun 28;74:102470. doi: 10.1016/j.eclinm.2024.102470 (PMC11544378; doi:10.1016/j.eclinm.2024.102470), 2024-06-28
Supplement: mmc1.pdf [file mmc1.pdf]

## Supplementary Tables and Figures

### **Early palliative care and overall survival in patients with metastatic upper gastrointestinal cancers (EPIC): a multicentre, open-label, randomised controlled phase 3 trial**

Prof Antoine Adenis MD PhD, Arlette Da Silva MD, Meher Ben Abdelghani MD, Vincent Bourgeois MD, Emilie Bogart Ms, Anthony Turpin MD PhD, Adrien Evin MD Msc, Aurelien Proux MD, Marie-Pierre Galais MD, Claire Jaraudias MD, Julia Quintin MD, Guillaume Bouquet MD, Emmanuelle Samalin MD, Nathalie Bremaud MD, Sahir Javed MD, Aline Henry MD, Prof Jean-Emmanuel Kurtz MD PhD, Delphine Cornuault-Foubert MD, Helene Vandamme MD, Elisabeth Lucchi PhD, Diane Pannier MD, Christine Belletier MD, Murielle Paul MD, Licia Touzet MD Ms, Prof Nicolas Penel MD PhD, Prof Gisele Chvetzoff MD PhD, Marie-Cécile Le Deley MD PhD

**Corresponding author:** Prof Antoine Adenis, Department of Medical Oncology, Institut du Cancer de Montpellier, 34298 Montpellier, France. Antoine.adenis@icm.unicancer.fr

#### Table of content

|                                                                                                                                                                 |   |
|-----------------------------------------------------------------------------------------------------------------------------------------------------------------|---|
| Supplementary Figure 1 - Cumulative incidence of first palliative care visit .....                                                                              | 2 |
| Supplementary Figure 2 – Kaplan-Meier survival curves for overall survival (per protocol dataset) 3                                                             | 3 |
| Supplementary Figure 3 - Quality of life scores over time for the 15 QLQ-C30 dimensions.....                                                                    | 4 |
| Supplementary Figure 4 - Kaplan–Meier curve of the time until definitive deterioration (TUDD) for the global health status. ....                                | 5 |
| Supplementary Table 1 - Treatments .....                                                                                                                        | 6 |
| Supplementary Table 2 - Quality of life analysis of time until definitive deterioration for each dimension of the quality of life questionnaires (QLQ-C30)..... | 7 |
| Supplementary Table 3 - HADS analysis.....                                                                                                                      | 8 |

**Supplementary Figure 1 - Cumulative incidence of first palliative care visit**

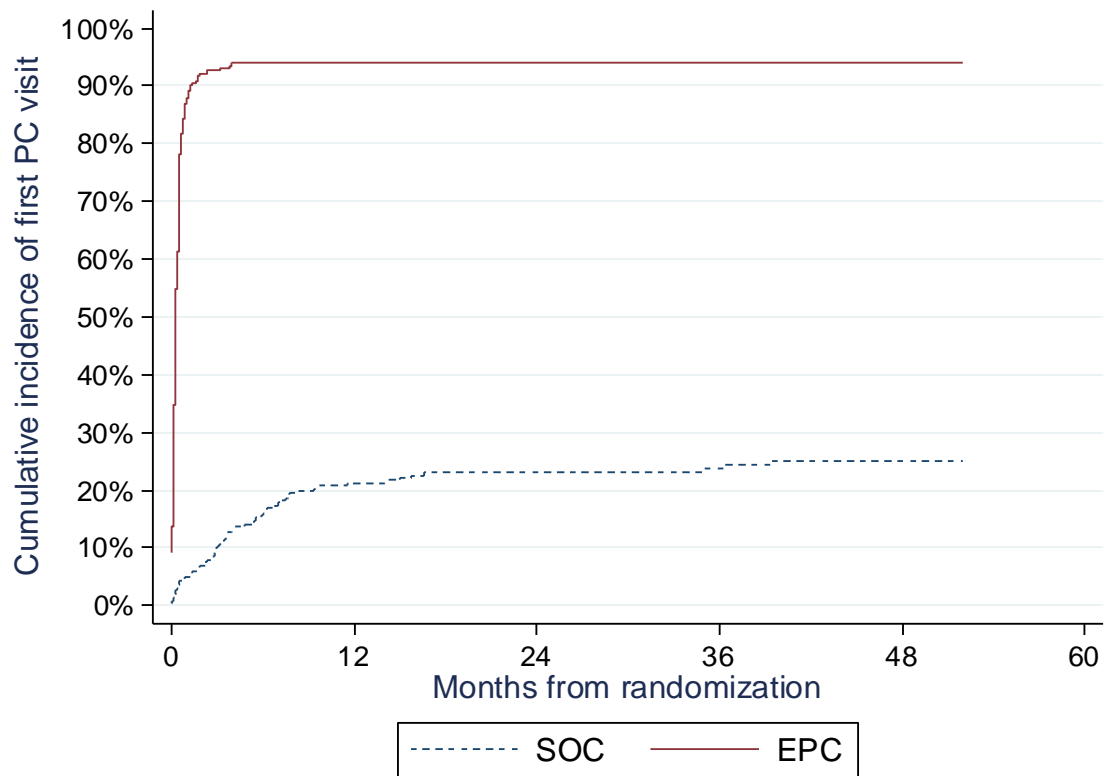

The cumulative incidence of palliative care visits was estimated from the time of randomisation to the first palliative care visit using the Kalbfleish and Prentice method ((Kalbfleisch JD. and Prentice RL. (1980). The statistical analysis of failure time data. John Wiley and Sons, New York), considering death without prior palliative care visits as a competing event.

Supplementary Figure 2 – Kaplan-Meier survival curves for overall survival (per protocol dataset)

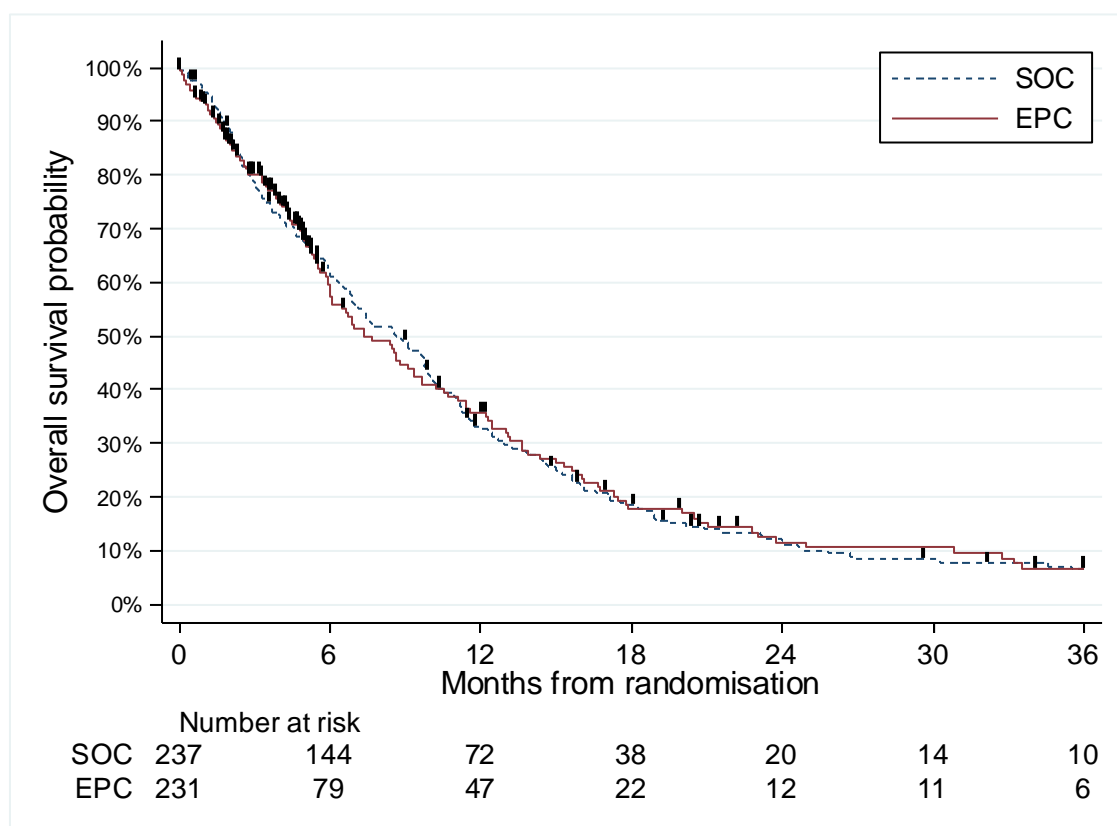

In the per protocol analysis, the median overall survival was 7.4 (6.0-9.6) the EPC group and 8.6 (6.9-9.9) in the SOC group. The 1-year overall survival was 35.8% (28.1-43.4) in the EPC group and 32.8% (26.8-38.9) in the SOC group. The hazard ratio of EPC/SOC was 1.04 (0.84-1.29) (p-value=0.71) in the Cox model stratified on the primary tumour site (with the four strata previously defined), and the ECOG performance status was 0-1 versus 2.

Supplementary Figure 3 - Quality of life scores over time for the 15 QLQ-C30 dimensions

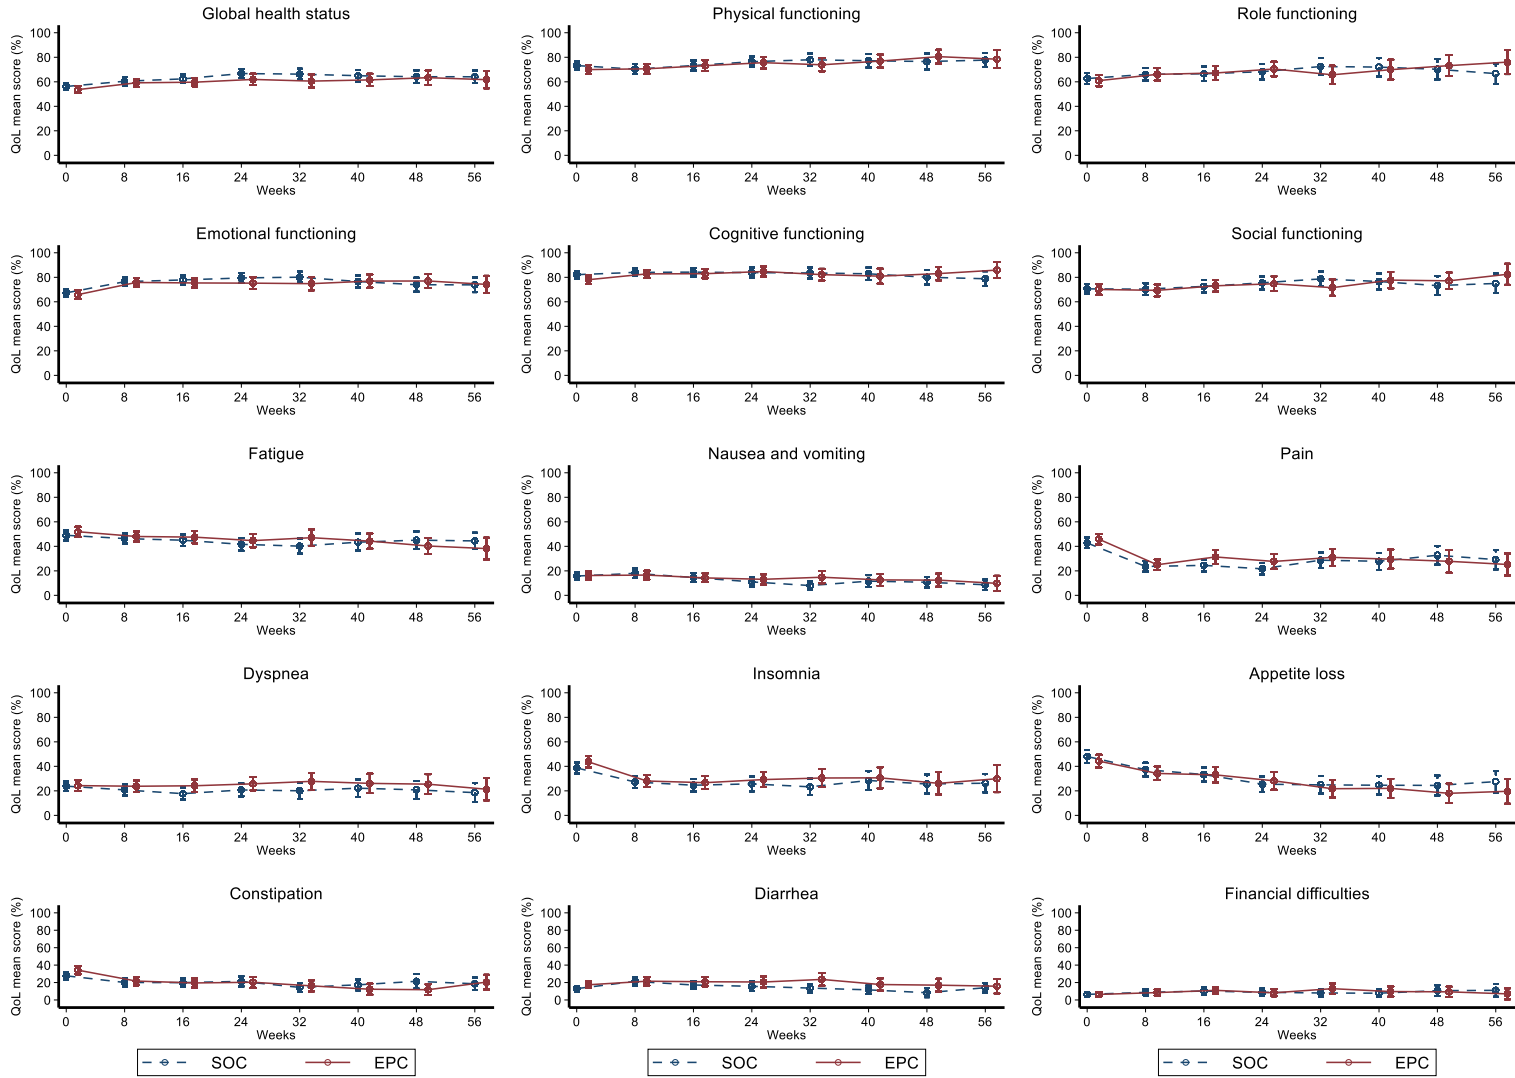

Supplementary Figure 4 - Kaplan–Meier curve of the time until definitive deterioration (TUDD) for the global health status.

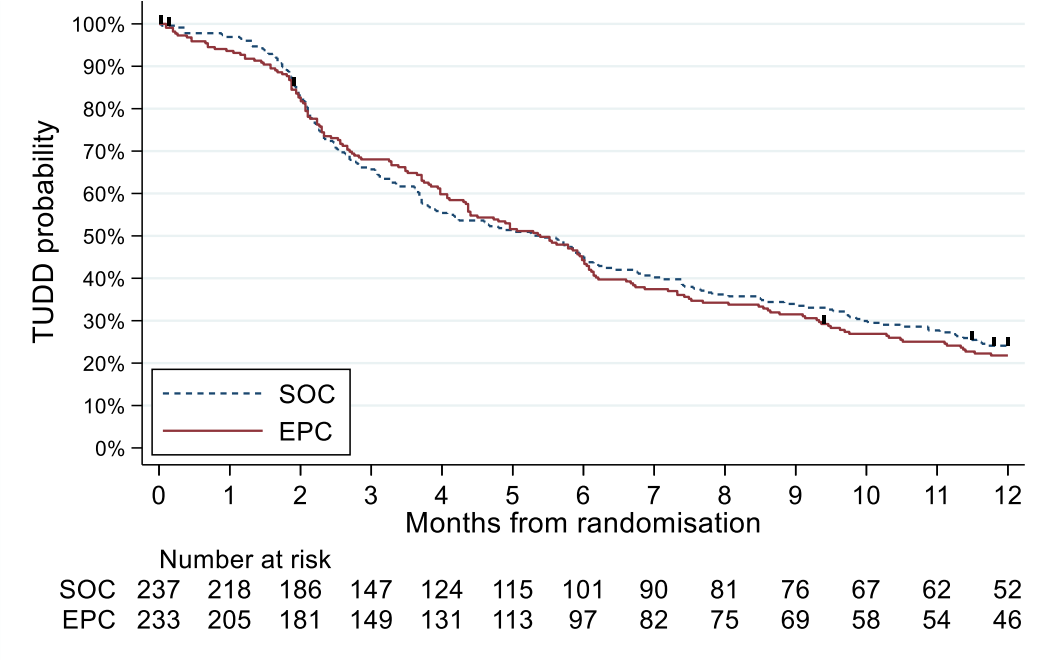

**Supplementary Table 1 - Treatments**

| Primary tumour location                                     | Chemotherapy                   | SOC (n=236 <sup>(1)</sup> ) | EPC (n=231 <sup>(1)</sup> ) |
|-------------------------------------------------------------|--------------------------------|-----------------------------|-----------------------------|
| Oesophageal                                                 | Folfox <sup>#</sup>            | 12                          | 14                          |
|                                                             | Folfiri <sup>#</sup>           | 0                           | 1                           |
|                                                             | others                         | 8                           | 4                           |
| Gastric or Oesogastric junctional                           | Folfox <sup>#</sup>            | 18                          | 11                          |
|                                                             | Folfiri <sup>#</sup>           | 0                           | 2                           |
|                                                             | others                         | 6                           | 11                          |
| Pancreatic                                                  | Gemcitabine-based              | 37                          | 41                          |
|                                                             | Folfox <sup>#</sup>            | 5                           | 9                           |
|                                                             | Folfirinox <sup>#</sup>        | 96                          | 85                          |
|                                                             | Others (including 1 MD in EPC) | 10                          | 11                          |
| Biliary tract                                               | gemcitabine                    | 8                           | 6                           |
|                                                             | Gemox <sup>#</sup>             | 11                          | 13                          |
|                                                             | Gemcis <sup>#</sup>            | 20                          | 22                          |
|                                                             | Others (including 1 MD in SOC) | 5                           | 2                           |
| Median 1st-line chemotherapy duration (interquartile range) |                                | 2.8m (1.4-5.1)              | 2.6m (1.0-5.1)              |

MD, missing data

<sup>#</sup> Chemotherapy regimen: Folfox, fluorouracil+leucovorin+oxaliplatin; Folfiri, fluorouracil+leucovorin+irinotecan; Folfirinox, fluorouracil+leucovorin+oxaliplatin+irinotecan; Gemox, gemcitabine+oxaliplatin; Gemcis, gemcitabine+cisplatin.

(1) Chemotherapy was not administered to one patient in the SOC group and to two patients in the EPC group.

**Supplementary Table 2 - Quality of life analysis of time until definitive deterioration for each dimension of the quality of life questionnaires (QLQ-C30)**

| QLQ-C30 dimension      | SOC group              |                              |                             | EPC group              |                              |                             | HR<br>(95% CI)   | p-value |
|------------------------|------------------------|------------------------------|-----------------------------|------------------------|------------------------------|-----------------------------|------------------|---------|
|                        | Total number of events | Number of QoL deteriorations | Median (months)<br>(95% CI) | Total number of events | Number of QoL deteriorations | Median (months)<br>(95% CI) |                  |         |
| Global health status   | 216                    | 62                           | 5.4 (3.8-6.1)               | 210                    | 50                           | 5.4 (4.4-6)                 | 1.02 (0.84-1.24) | 0.83    |
| Physical functioning   | 215                    | 27                           | 6.8 (5.3-8.5)               | 210                    | 35                           | 5.8 (4.9-6.6)               | 1.06 (0.88-1.29) | 0.52    |
| Role functioning       | 219                    | 38                           | 6.3 (5-7.7)                 | 211                    | 54                           | 5 (4.1-5.9)                 | 1.10 (0.91-1.33) | 0.31    |
| Emotional functioning  | 219                    | 73                           | 4.2 (3.6-5.6)               | 212                    | 73                           | 4.4 (3.6-5.3)               | 1.02 (0.84-1.23) | 0.86    |
| Cognitive functioning  | 213                    | 40                           | 6.1 (5-7.5)                 | 210                    | 50                           | 5 (4.1-6)                   | 1.09 (0.90-1.31) | 0.40    |
| Social functioning     | 217                    | 38                           | 6.6 (5.3-8.4)               | 209                    | 48                           | 5.4 (4.4-6.1)               | 1.08 (0.89-1.30) | 0.44    |
| Fatigue                | 216                    | 53                           | 5.8 (4.2-7)                 | 215                    | 60                           | 4.9 (4-5.9)                 | 1.09 (0.91-1.32) | 0.35    |
| Nausea and vomiting    | 220                    | 41                           | 6.3 (5.1-7.5)               | 210                    | 38                           | 5.8 (4.5-6.2)               | 1.02 (0.85-1.24) | 0.82    |
| Pain                   | 222                    | 77                           | 4.2 (3.2-5.7)               | 214                    | 76                           | 4 (3.3-5.1)                 | 0.99 (0.82-1.19) | 0.88    |
| Dyspnoea               | 216                    | 38                           | 6.8 (5.3-7.6)               | 207                    | 44                           | 5.4 (4.4-6)                 | 1.06 (0.87-1.28) | 0.57    |
| Insomnia               | 220                    | 72                           | 4.4 (3.5-5.7)               | 216                    | 91                           | 3.6 (2.8-4.3)               | 1.19 (0.99-1.44) | 0.068   |
| Appetite loss          | 217                    | 63                           | 5.3 (4-6.2)                 | 213                    | 54                           | 5 (4.1-5.9)                 | 1.03 (0.85-1.24) | 0.79    |
| Constipation           | 217                    | 60                           | 6 (4.2-6.8)                 | 210                    | 64                           | 3.9 (3.3-5)                 | 1.05 (0.87-1.27) | 0.62    |
| Diarrhoea              | 212                    | 31                           | 6.8 (5.8-8)                 | 206                    | 35                           | 6 (5-6.8)                   | 1.08 (0.89-1.31) | 0.41    |
| Financial difficulties | 211                    | 16                           | 7.5 (6.2-9.1)               | 202                    | 11                           | 6.4 (5.8-8.5)               | 1.00 (0.82-1.22) | 0.98    |
| Pain alone             | 217                    | 73                           | 4 (3.1-5.6)                 | 217                    | 67                           | 4.3 (3.6-5.1)               | 1.01 (0.84-1.22) | 0.90    |

SOC, standard oncological care alone; EPC, early palliative care; HR, hazard ratio; 95% CI, 95% confidence interval; QoL, quality of life.

Total number of events: For each dimension and each treatment group, the total number of events was considered in the estimate of the time until definitive deterioration curve, including definitive deterioration of the QLQ-C30 score and deaths.

Number of QoL deteriorations: Number of patients with a decrease in the QoL score by more than 10 points compared with the score at baseline, without later improvement superior to 10 points compared with baseline, or with no further evaluation available.

**Supplementary Table 3 - HADS analysis**

| HADS Questionnaire                           | SOC      |        |        |       |         |         | EPIC     |        |        |        |         |       |
|----------------------------------------------|----------|--------|--------|-------|---------|---------|----------|--------|--------|--------|---------|-------|
|                                              | Baseline |        | Week 8 |       | Week 16 |         | Baseline |        | Week 8 |        | Week 16 |       |
|                                              | N        | %      | N      | %     | N       | %       | N        | %      | N      | %      | N       | %     |
| <b>Questionnaire completion</b>              |          |        |        |       |         |         |          |        |        |        |         |       |
| Missing                                      | 15       | 6.3%   | 41     | 17.3% | 47      | 19.8%   | 13       | 5.6%   | 52     | 22.3%  | 48      | 20.6% |
| Completed                                    | 222      | 93.7%  | 161    | 67.9% | 124     | 52.3%   | 220      | 94.4%  | 145    | 62.2%  | 121     | 51.9% |
| Patient deceased                             | 0        | 0.0%   | 35     | 14.8% | 66      | 27.8%   | 0        | 0.0%   | 36     | 15.5%  | 64      | 27.5% |
| <b>HADS Anxiety score</b>                    | N=221    |        | N=161  |       | N=124   |         | N=220    |        | N=145  |        | N=121   |       |
| Median - (Range)                             | 7        | (4-10) | 5      | (3-8) | 5       | (3-8)   | 8        | (5-11) | 6      | (3-9)  | 6       | (4-9) |
| Mean - SD                                    | 7.3      | 4.2    | 6      | 4     | 5.4     | 3.7     | 8.6      | 4.4    | 6.4    | 3.7    | 6.6     | 3.7   |
| No anxiety (score ≤7)                        | 129      | 58.4%  | 112    | 69.6% | 90      | 72.6%   | 95       | 43.2%  | 89     | 61.4%  | 73      | 60.3% |
| Doubtful anxiety (score between 8 and 10)    | 46       | 20.8%  | 30     | 18.6% | 24      | 19.4%   | 54       | 24.5%  | 39     | 26.9%  | 34      | 28.1% |
| Definite anxiety (score ≥11)                 | 46       | 20.8%  | 19     | 11.8% | 10      | 8.1%    | 71       | 32.3%  | 17     | 11.7%  | 14      | 11.6% |
| <b>HADS Depression score</b>                 | N=222    |        | N=161  |       | N=124   |         | N=220    |        | N=145  |        | N=121   |       |
| Median - (Range)                             | 6        | (3-10) | 6      | (3-9) | 6       | (2.5-8) | 7        | (4-11) | 6      | (3-10) | 6       | (3-9) |
| Mean - SD                                    | 6.6      | 4.8    | 6.3    | 4.1   | 5.9     | 4.3     | 7.5      | 5.1    | 6.8    | 4.5    | 6.3     | 4.3   |
| No depression (score ≤7)                     | 133      | 59.9%  | 100    | 62.1% | 84      | 67.7%   | 125      | 56.8%  | 86     | 59.3%  | 80      | 66.1% |
| Doubtful depression (score between 8 and 10) | 48       | 21.6%  | 34     | 21.1% | 20      | 16.1%   | 37       | 16.8%  | 30     | 20.7%  | 21      | 17.4% |
| Definite depression (score ≥11)              | 41       | 18.5%  | 27     | 16.8% | 20      | 16.1%   | 58       | 26.4%  | 29     | 20.0%  | 20      | 16.5% |

SOC, standard oncological care alone; EPC, early palliative care; HADS, hospital anxiety and depression scale; SD, standard deviation
